# Supplementary material
Source: PubMed Central journal article supplement (PMC7337596)
Supplement: NIHMS89945-supplement-Supplemental_Fig_.pdf [file NIHMS89945-supplement-Supplemental_Fig_.pdf]

## Supplemental Figure 1

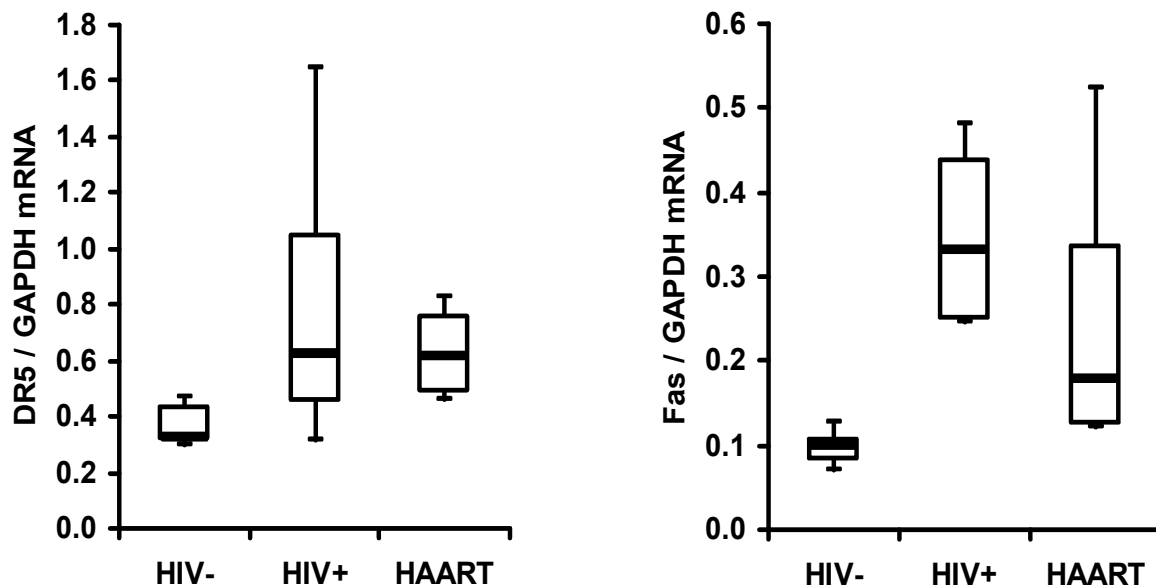

mRNA expression of DR5 (**right**) and Fas (**left**) in whole tonsil tissue from HIV- donors, HIV+ patients and HAART patients. mRNA expression was normalized using the GAPDH housekeeping gene.
